# Supplementary material for: Relative Quantitation of Glycopeptides Based on Stable Isotope Labeling Using MALDI-TOF MS
Source: PubMed Central journal article supplement (PMC6271863; doi:10.3390/molecules19079944), 2014-07-09
Supplement: molecules-19-09944-s001.pdf [file molecules-19-09944-s001.pdf]

# Supplementary Materials

## Material and Methods

For investigation of labeling reagents, we prepared the glycopeptide from egg yolk sialoglycopeptide (Tokyo Chemical Industry, Tokyo, Japan). Sialoglycopeptide (10  $\mu$ M, 100  $\mu$ L) was mixed with 110  $\mu$ L of 7 M ammonium hydroxide solution, and reacted with *O*-methylisourea hydrochloride (9 M, 30  $\mu$ L) at 65 °C for 30 min. using the method reported by Beardsley [1]. After addition of 300  $\mu$ L of 10% trifluoroacetic acid, the solution was concentrated using a centrifugal evaporation system. The sample was dissolved in 100  $\mu$ L of 0.8% trifluoroacetic acid and heated at 90 °C for 30 min to remove sialic acid by acid-hydrolysis. The product was isolated using a graphite carbon column (InertSep GC 50 mg, GL Science, Tokyo, Japan). H-Homoarg-Val-Ala-Asn (Hex<sub>5</sub>HexNAc<sub>4</sub>)-Homoarg-Thr-OH containing single amino group at the *N*-terminal end of glycopeptides, was obtained. Labeled glycopeptides were prepared as the described in experimental section. Acetyl, naphthoyl, pyrenoyl reagents were prepared from acetic acid, 2-naphthoic acid, 1-pyrenecarboxylic acid. 10 pmol of each samples was analyzed using MALDI-TOF MS.

For preparation of glycopeptides consisted of MLTK peptide sequence, bovine ribonuclease B (200  $\mu$ g, Sigma-Aldrich, Milwaukee, WI, USA) was dissolved in 500  $\mu$ L of 50 mM ammonium bicarbonate solution, and heated at 100 °C for 15 min. After the sample cooled, 50  $\mu$ L of 1% aqueous RapiGest SF (v/v) and 2  $\mu$ L of TPCK-treated trypsin (20 g) were added, followed by incubation at 37 °C for 300 min. The sample was heated at 100 °C for 15 min, and then desalted by G-25 gel filtration column (0.8  $\times$  3.5 cm) and concentrated using a centrifugal evaporation system. The sample was dissolved in 20  $\mu$ L of water, added with Sepharose 4B (wet vol. 50  $\mu$ L), 100  $\mu$ L of ethanol, 400  $\mu$ L of butanol, and mixed with tube rotator at room temperature for 1 h. The resin was washed thoroughly with 2 mL of 10:2.5:2.2:0.3 (v/v/v/v) butanol/ethanol/ water/formic acid, the labeled glycopeptides was eluted with 1.3 mL of 25% ethanol, concentrated using a centrifugal evaporation system. Sample (100  $\mu$ L) was mixed with 110  $\mu$ L of 7 M ammonium hydroxide solution, and reacted with *O*-methylisourea hydrochloride (9 M, 30  $\mu$ L) at 65 °C for 30 min. After addition of 300  $\mu$ L of 10% trifluoroacetic acid, the solution was concentrated using a centrifugal evaporation system. Labeled glycopeptides were prepared as the described in the Experimental Section.

**Figure S1.** MS spectra of benzoyl (black triangle) and acetyl (gray triangle) and unlabeled (white triangle) glycopeptides.

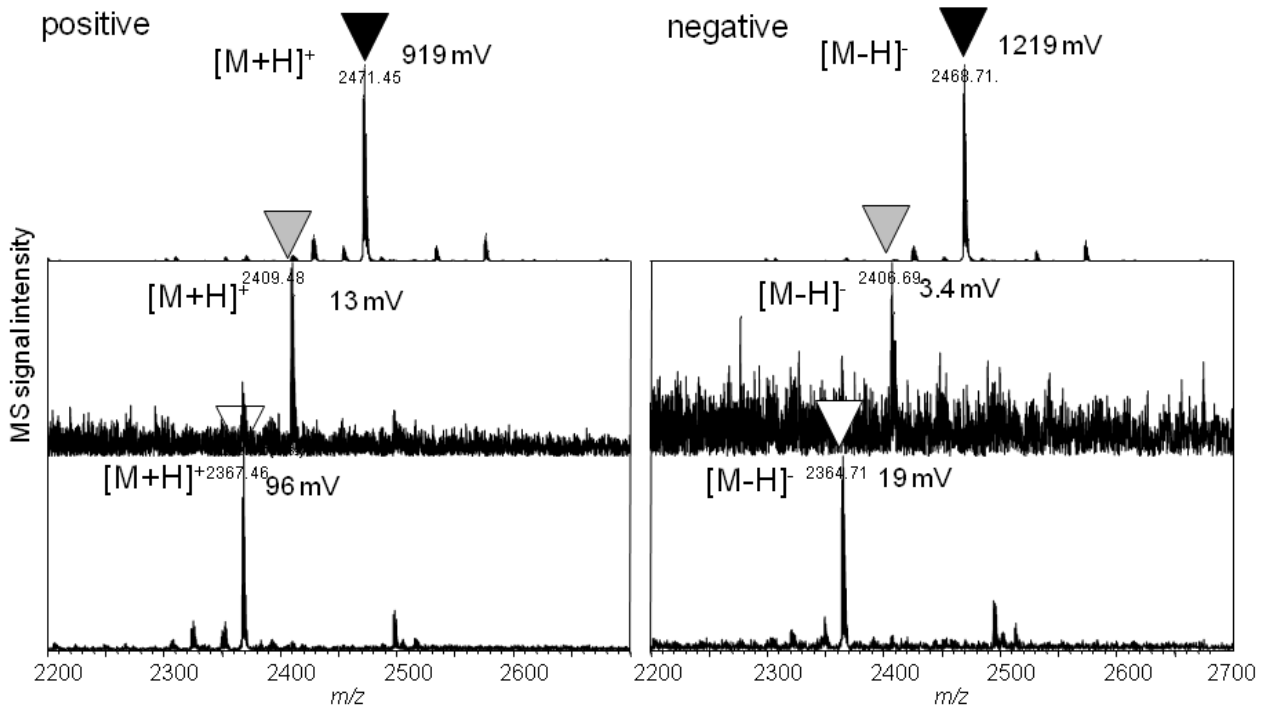

**Figure S2.** MS spectra of a 1:1 mixture of unlabeled and benzoyl glycopeptides from hIgG in positive and negative mode.

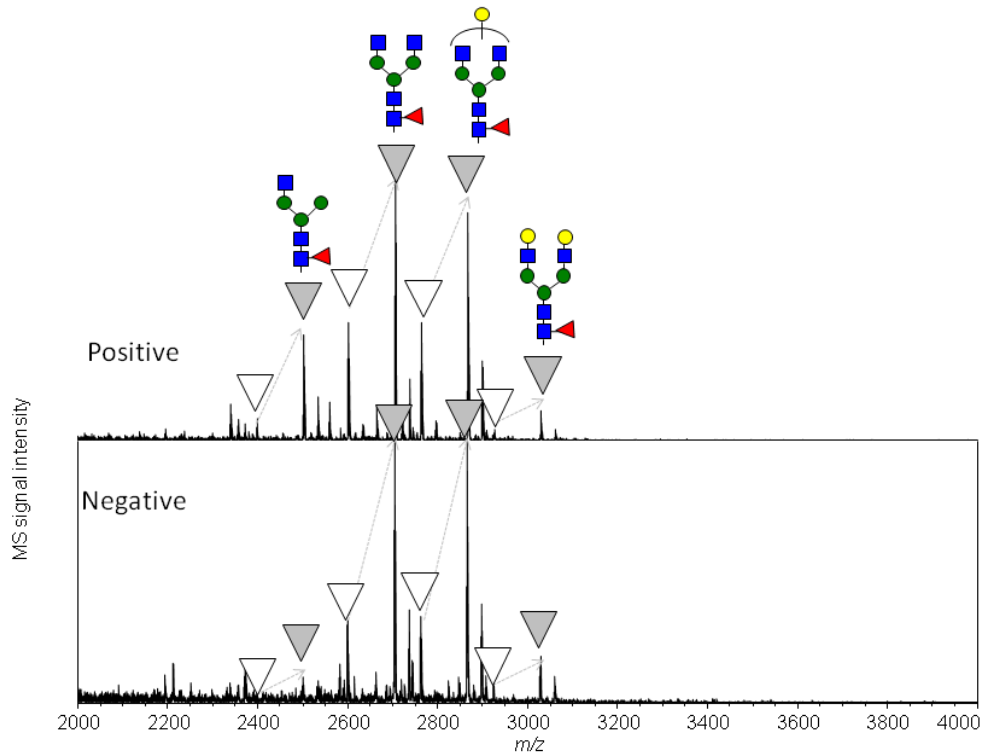

**Figure S3.** MS spectra of a 1:1 mixture of unlabeled and benzoyl glycopeptides from bovine RN'ase B in positive and negative mode.

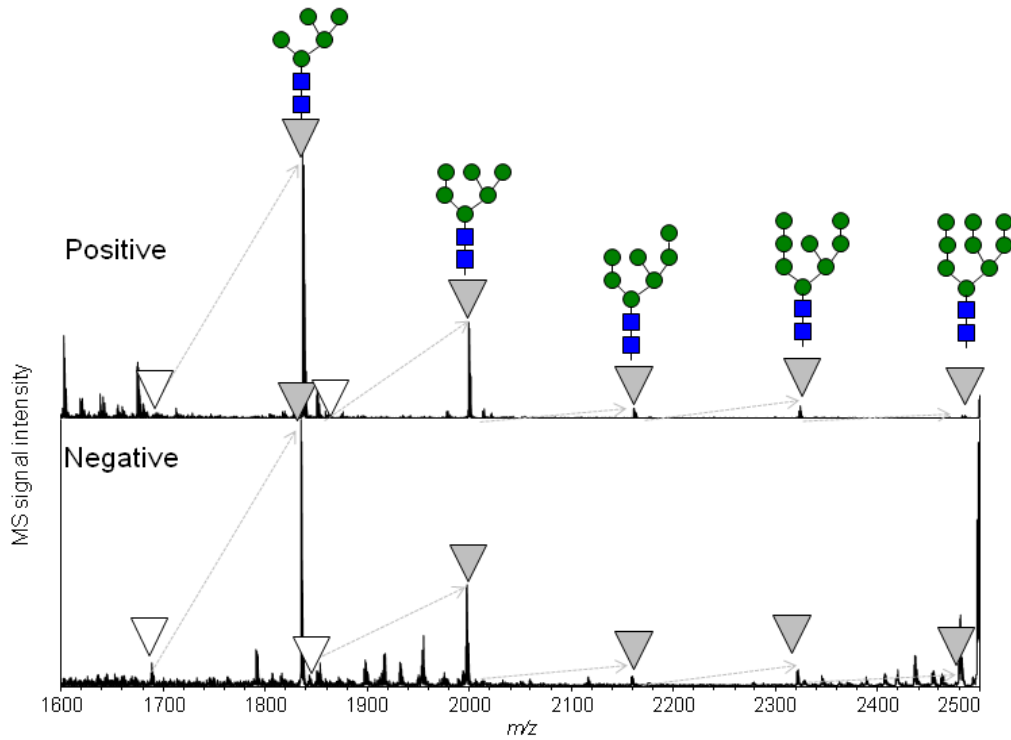

**Figure S4.** MS spectra of a 1:1 mixture of benzoyl and naphthoyl glycopeptides from egg yolk glycopeptides in positive and negative mode

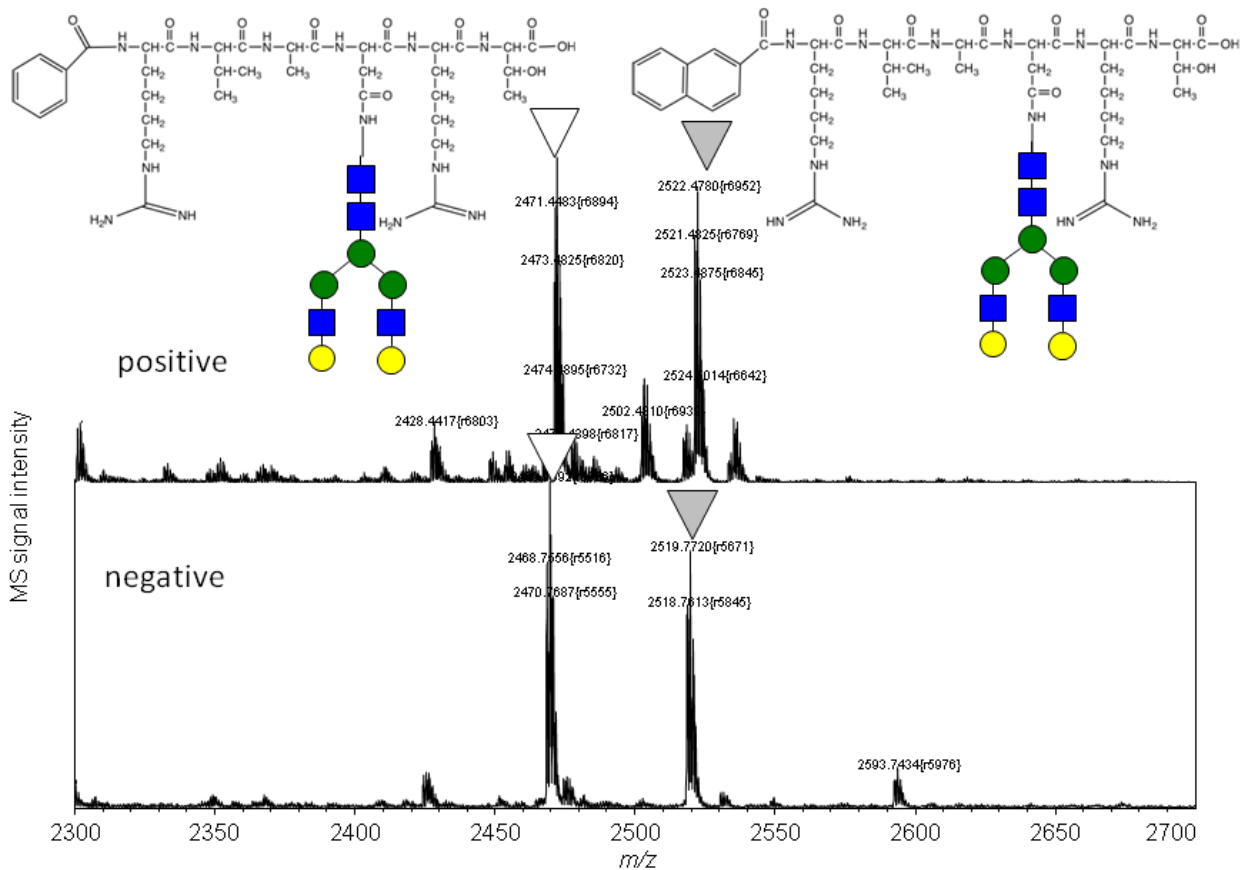

**Figure S5.** MS spectra of a 1:1 mixture of benzoyl and pyrenoyl glycopeptides from egg yolk glycopeptides in positive and negative mode.

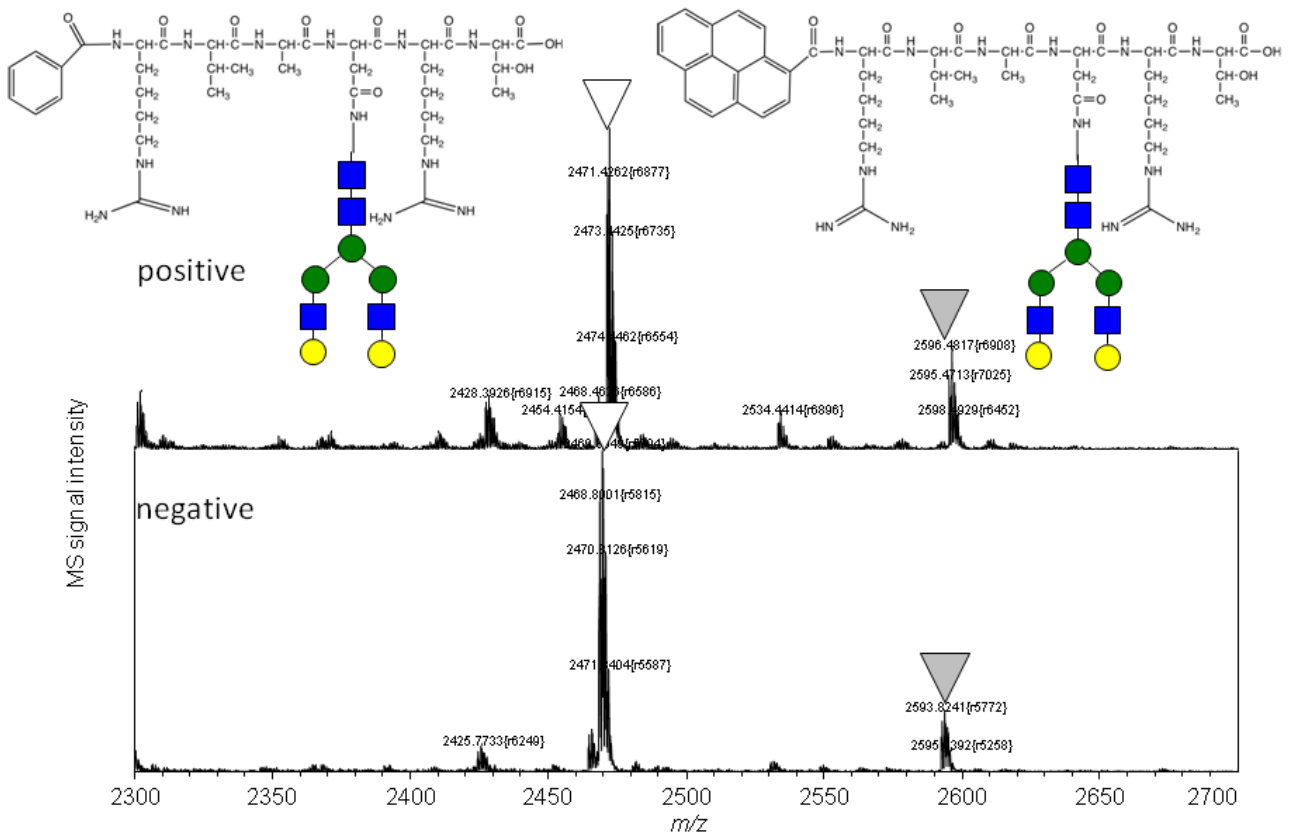

**Figure S6.** (A) MS spectra of a 1:1 mixture of Bz- and d-Bz-labeled glycopeptides from hIgG using different amounts (20, 4, 2, 1.2, 0.4 pmol) of sample in positive mode; (B) The plot of each peak ratio of 6 isotopic pairs; (C) The plot of each peak ratio of 3 isotopic pairs from the same peptides.

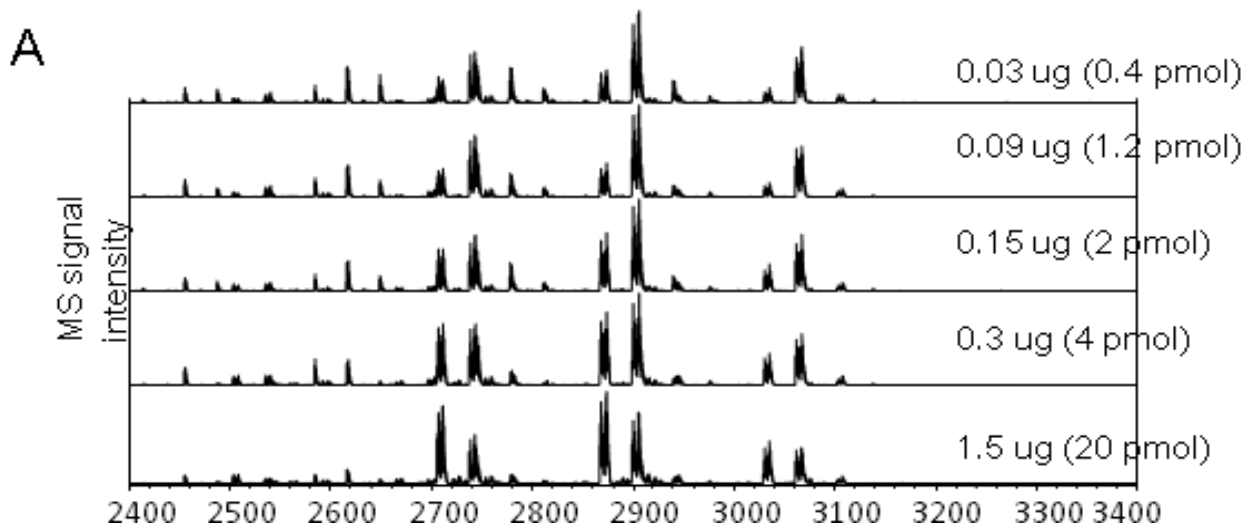

Figure S6. *Cont.*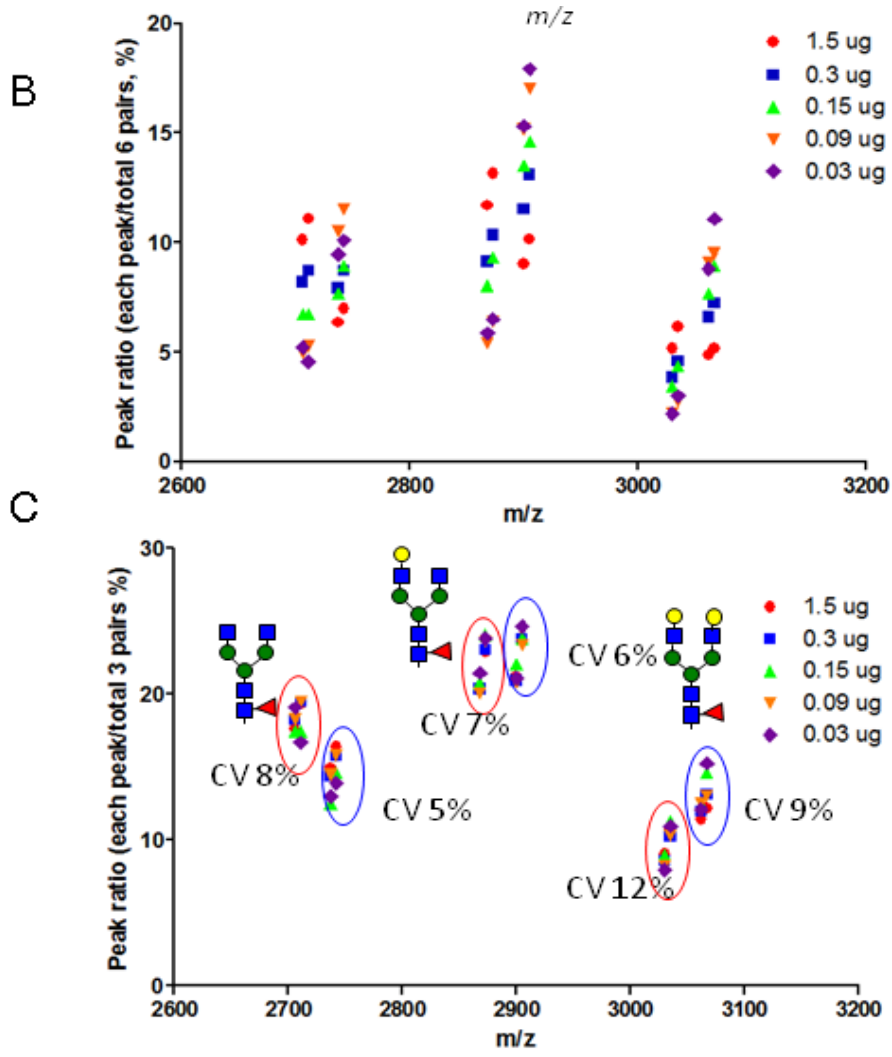

**Table S1.** The data from Figure 2 (1:1 mixture of Bz- and d-Bz-labeled glycopeptides from hIgG). (Values highlighted in yellow are estimated values because the targeted peak overlapped with other peaks.)

| No. | Composition<br>(Hex, HexNAc,<br>dHex)<br>Structure                                  | Glycan<br>(mass) | Bz | IgG1                        |                |                   | IgG2                        |                |                   |
|-----|-------------------------------------------------------------------------------------|------------------|----|-----------------------------|----------------|-------------------|-----------------------------|----------------|-------------------|
|     |                                                                                     |                  |    | Bz-EEQYNSTYR (1293.23)      |                |                   | Bz-EEQFNSTFR (1261.23)      |                |                   |
|     |                                                                                     |                  |    | calcd<br>[M+H] <sup>+</sup> | Found<br>(m/z) | Intensity<br>(mV) | calcd<br>[M+H] <sup>+</sup> | Found<br>(m/z) | Intensity<br>(mV) |
| 1   |    | 1241.45          | H  | 2534.68                     | 2534.57        | 13                | 2502.68                     | 2502.54        | 25                |
|     |                                                                                     |                  | D  | 2539.71                     | 2539.57        | 13                | 2507.71                     | 2507.58        | 26                |
| 2   |    | 1298.47          | H  | 2591.7                      | 2591.61        | 9.1               | 2559.7                      | 2559.63        | 8.7               |
|     |                                                                                     |                  | D  | 2596.73                     | 2596.64        | 7.1               | 2564.73                     | 2564.84        | 8.3               |
| 3   |    | 1403.5           | H  | 2696.73                     | 2696.74        | 8.4               | 2664.73                     | 2664.71        | 15                |
|     |                                                                                     |                  | D  | 2701.76                     | 2701.66        | 9.3               | 2669.76                     | 2669.72        | 15                |
| 4   |   | 1444.53          | H  | 2737.76                     | 2737.7         | 69                | 2705.76                     | 2705.77        | 151               |
|     |                                                                                     |                  | D  | 2742.79                     | 2742.71        | 65                | 2710.79                     | 2710.72        | 145               |
| 5   |  | 1460.52          | H  | 2753.75                     | 2753.75        | 12                | 2721.75                     | 2721.64        | 12                |
|     |                                                                                     |                  | D  | 2758.78                     | 2758.74        | 11                | 2726.78                     | 2726.72        | 13                |
| 6   |  | 1606.58          | H  | 2899.81                     | 2899.74        | 95                | 2867.81                     | 2867.77        | 159               |
|     |                                                                                     |                  | D  | 2904.84                     | 2904.86        | 95                | 2872.84                     | 2872.72        | 165               |
| 7   |  | 1647.61          | H  | 2940.84                     | 2938.75        | 20                | 2908.84                     | 2908.8         | 14.6              |
|     |                                                                                     |                  | D  | 2945.87                     | 2943.96        | 24                | 2913.87                     | 2913.8         | 18                |
| 8   |  | 1768.63          | H  | 3061.86                     | 3061.72        | 31                | 3029.86                     | 3029.71        | 65                |
|     |                                                                                     |                  | D  | 3066.89                     | 3066.74        | 36                | 3034.89                     | 3034.77        | 67                |
| 9   |  | 1809.66          | H  | 3102.89                     | 3102.86        | 10                | 3070.89                     | 3070.75        | 6.7               |
|     |                                                                                     |                  | D  | 3107.92                     | 3107.74        | 12                | 3075.92                     | 3075.86        | 8.1               |
| 10  |  | 1971.71          | H  | 3264.94                     | 3264.9         | 1.1               | 3232.94                     | 3232.67        | 1                 |
|     |                                                                                     |                  | D  | 3269.97                     | 3269.8         | 1                 | 3237.97                     | 3237.85        | 1.5               |

**Figure S7.** MS/MS spectra of Bz and d-Bz-labeled glycopeptides from hIgG in positive mode.

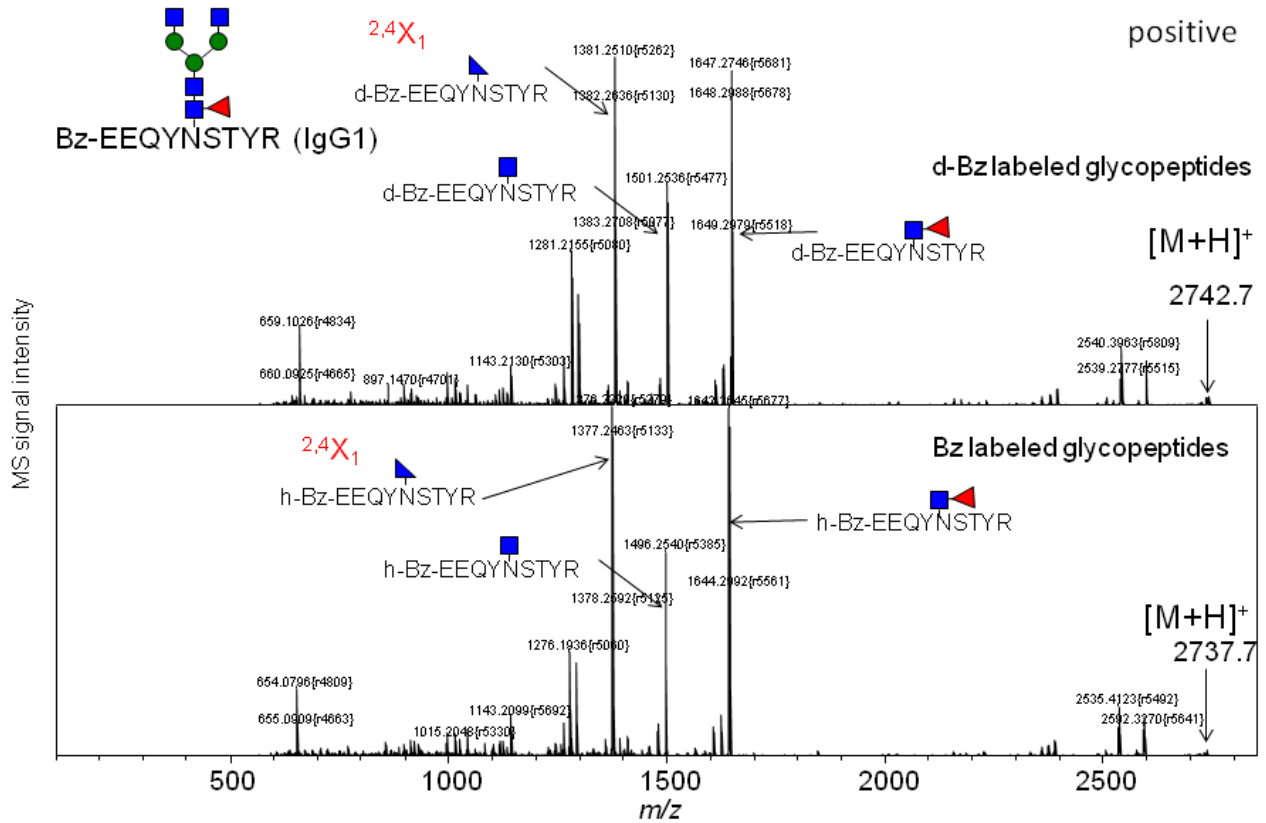

**Figure S8.** MS/MS spectra of Bz and d-Bz-labeled glycopeptides from hIgG in negative mode.

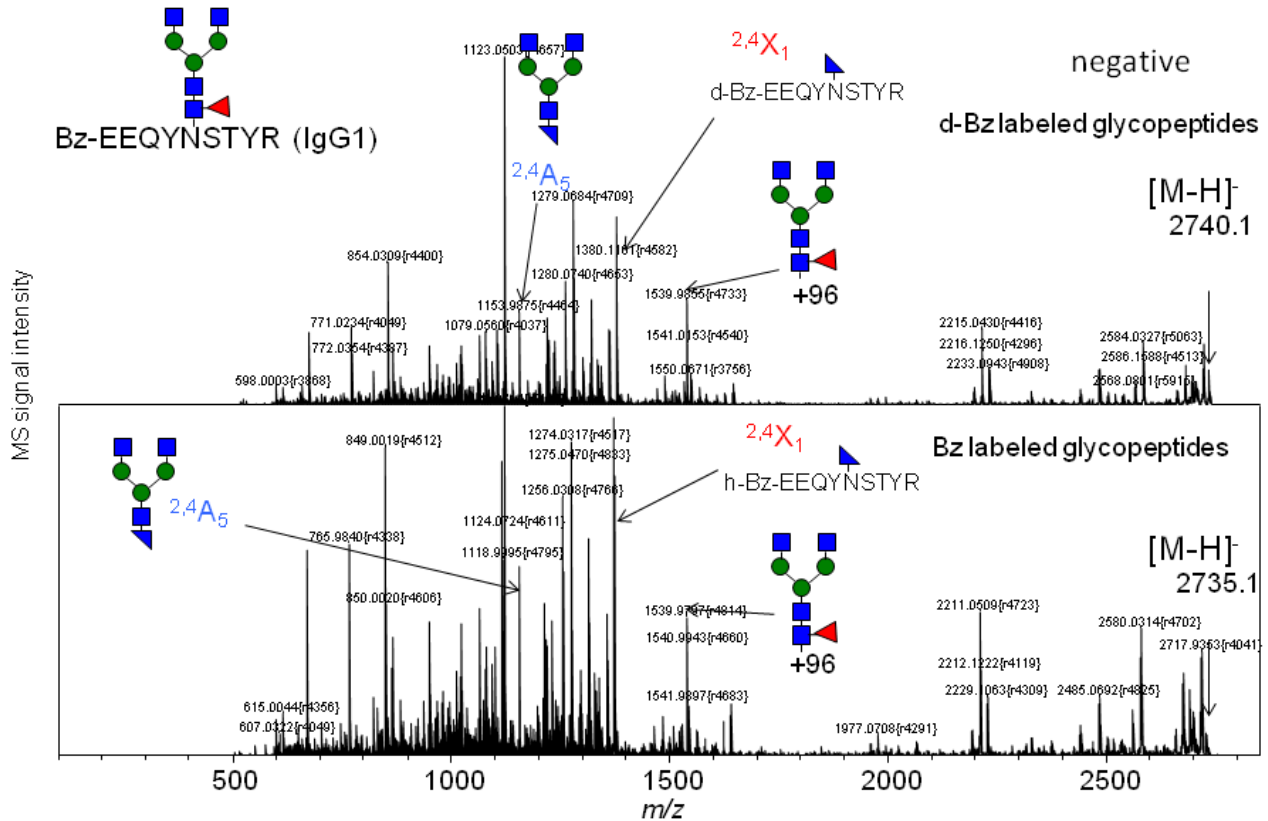

**Figure S9.** Calibration of glycopeptides from hIgG after reaction with  $\beta$ -GlcNAc'ase (A) MS spectra of Bz- and d-Bz-labeled glycopeptides mixed in different molar ratios (0.1:1, 0.3:1, 0.75:1, 1:1, 1.5:1, 2:1); (B) Calibration curves (peak intensity ratio vs. molar ratio).

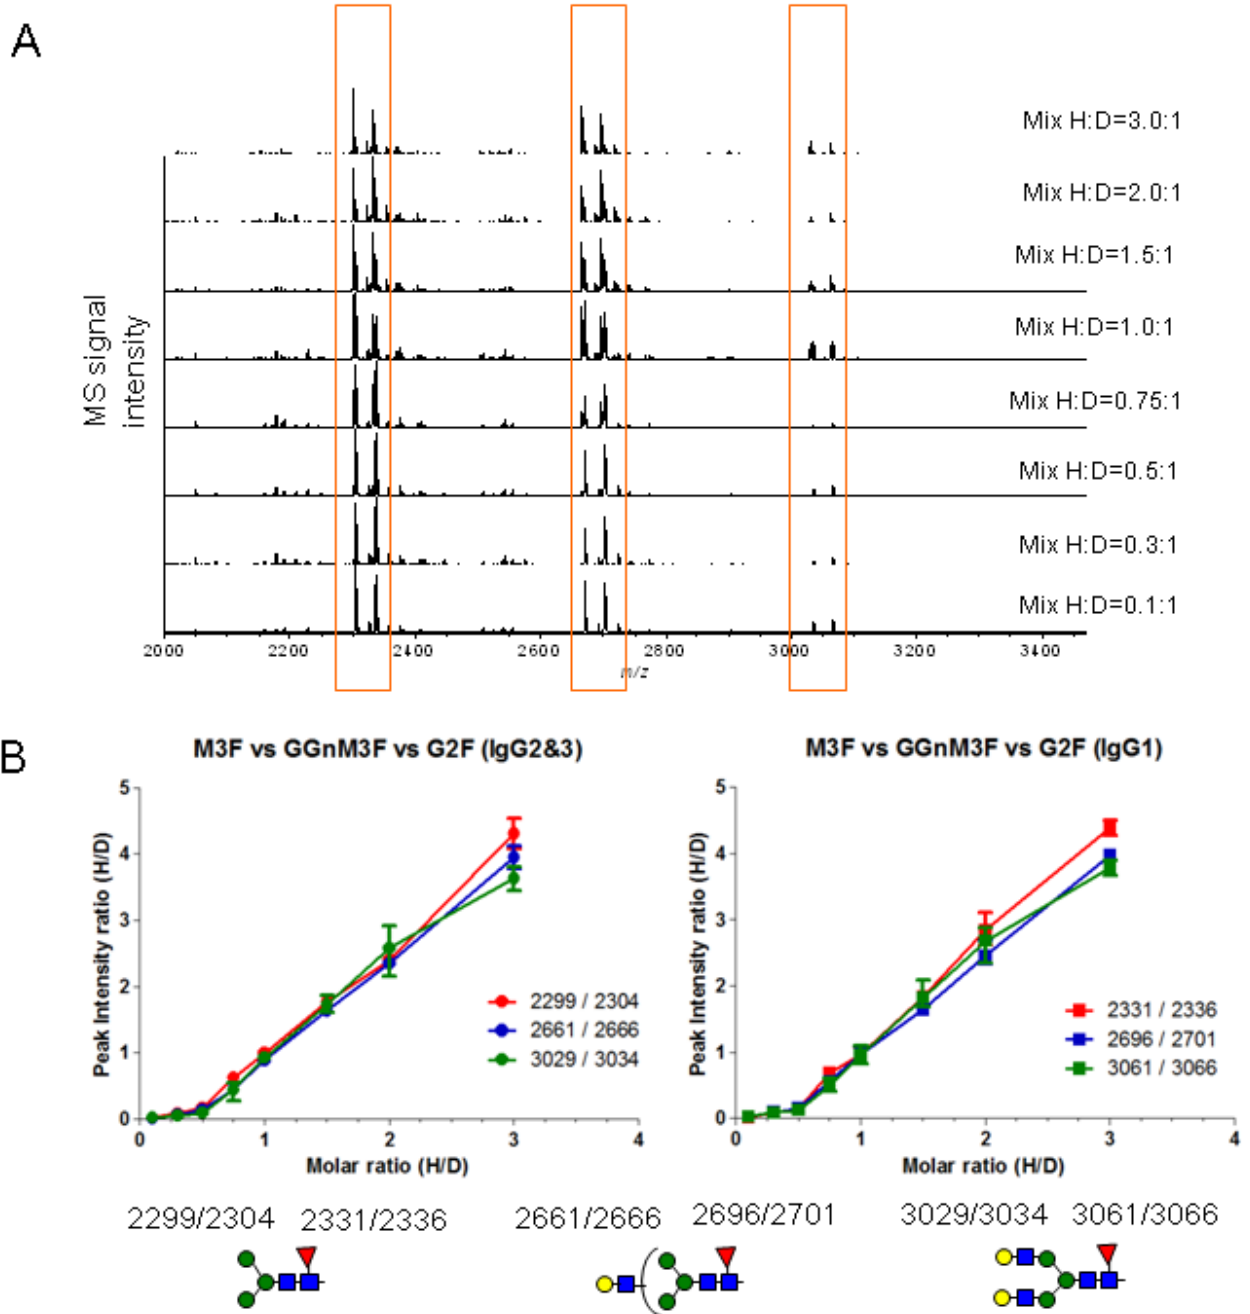



**Figure S10.** MS spectra of a 1:1 mixture of Bz- and d-Bz-labeled glycopeptides from hIgG in positive mode (**lower**) and negative mode (**upper**).

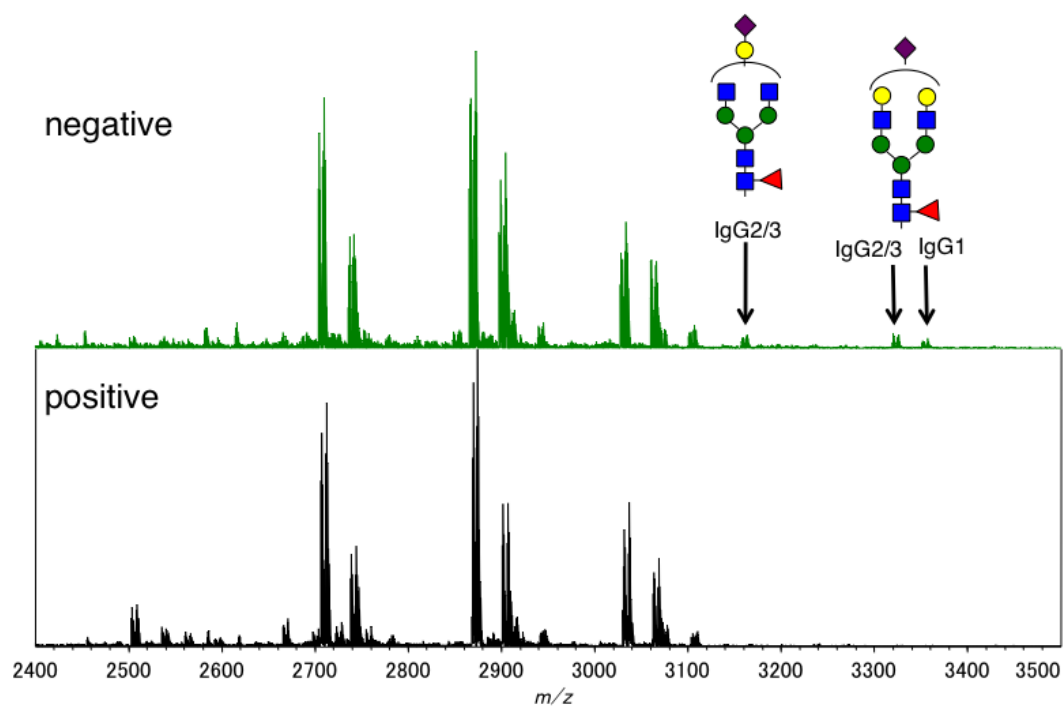

## Reference

1. Beardsley, R.L.; Reilly, J.P. Optimization of guanidination procedures for MALDI mass mapping. *Anal. Chem.* **2002**, *74*, 1884–1890.
